# Supplementary material for: Photographic Atlas and Three-Dimensional Reconstruction of the Holotype Skull of Euhelopus zdanskyi with Description of Additional Cranial Elements
Source: PubMed Central journal article supplement (PMC3836988; doi:10.1371/journal.pone.0079932), 2013-11-21
Supplement: pone.0079932.s003.pdf [file pone.0079932.s003.pdf]

*Euhelopus zdanskyi* (Wiman, 1929) Romer, 1956: holotype (PMU 24705; formerly PMU R 233) elements held in the Museum of Evolution, Uppsala, Sweden

| <i>Euhelopus zdanskyi</i> holotype ("exemplar a") | PMU R 233   | PMU 24705    | Wiman, 1929                                                                                         |                                                                                                                                                      | Mateer & McIntosh, 1985                                                                                                                                                                                                |                                                                                               | Wilson & Upchurch, 2009                                                                                                                                                                                                                                                                                                                         |                             |
|---------------------------------------------------|-------------|--------------|-----------------------------------------------------------------------------------------------------|------------------------------------------------------------------------------------------------------------------------------------------------------|------------------------------------------------------------------------------------------------------------------------------------------------------------------------------------------------------------------------|-----------------------------------------------------------------------------------------------|-------------------------------------------------------------------------------------------------------------------------------------------------------------------------------------------------------------------------------------------------------------------------------------------------------------------------------------------------|-----------------------------|
| Element                                           | Old number  | New number   | Description                                                                                         | Figure(s)                                                                                                                                            | Description                                                                                                                                                                                                            | Figure(s)                                                                                     | Description                                                                                                                                                                                                                                                                                                                                     | Figure(s)                   |
| <b>Premaxilla and maxilla (Left)</b>              | PMU R 233 a | PMU 24705/1a | Pages 7-8: interpreted four teeth in premaxilla, one at premaxilla-maxilla suture, nine in maxilla. | Plate 1, fig. 2 (lateral*), 3 (anterior*) and 4 (dorsal*); Plate 2, fig. 1 (lateral) and 2 (medial)                                                  | -                                                                                                                                                                                                                      | Figure 5, a (lateral) and b (medial); Figure 6 (lateral*)                                     | Page 207 (premaxilla): fully described - step-like offset of snout and lateral plate supporting teeth noted; Pages 207-208 (maxilla): fully described, preantorbital fenestra, lack of antorbital fossa and jugal articulation noted.                                                                                                           | Figure 6 (reversed; medial) |
| <b>Premaxilla and maxilla (Right)</b>             | PMU R 233 a | PMU 24705/1b | Pages 7-8: interpreted four teeth in premaxilla, one at premaxilla-maxilla suture, nine in maxilla. | Plate 1, fig. 1 (lateral*), 3 (anterior*) and 4 (dorsal*); Plate 2, fig. 3 (medial) and 4 (lateral)                                                  | -                                                                                                                                                                                                                      | Figure 5, c (medial) and d (lateral)                                                          | Page 207 (premaxilla): fully described - step-like offset of snout and lateral plate supporting teeth noted; Pages 207-208: fully described, preantorbital fenestra, lack of antorbital fossa and jugal articulation noted.                                                                                                                     | -                           |
| <b>Postorbital (Right)</b>                        | PMU R 233 a | PMU 24705/1g | Page 9: interpreted to be attached to part of postfrontal.                                          | Plate 1, fig. 1 (lateral), 4 (dorsal), 9 (medial) and 10 (lateral)                                                                                   | -                                                                                                                                                                                                                      | Figure 6 (reversed; lateral*)                                                                 | Page 208: fully described, incorrectly listed as the left element on page 207 but description only makes sense if it is the right.                                                                                                                                                                                                              | -                           |
| <b>Squamosal (Left)</b>                           | PMU R 233 a | PMU 24705/1h | Page 9: interpreted as the right squamosal, depicted upside down.                                   | Plate 1, fig. 1 (lateral; upside down*), 4 ("dorsal"; actually ventrolateral and upside down*); 7 (lateral; upside down) and 8 (medial; upside down) | Page 125-126: corrected Wiman's interpretation of this element - showed it was from the left side, not the right, and figured and mounted upside down by Wiman.                                                        | Figure 1, a (medial) and b (lateral); Figure 6 (lateral*)                                     | Pages 208-209: fully described, noted as being incorrectly mounted (upside down as the right squamosal), interpreted the ventral process as broken                                                                                                                                                                                              | -                           |
| <b>Quadrate and pterygoid (Right)</b>             | PMU R 233 a | PMU 24705/1k | Page 8-9: vomer not recognised; part of quadratojugal thought to be present.                        | Plate 1, fig. 1 (lateral*); Plate 2, fig. 5 (medial), 6 (lateral) and 7 (posterior)                                                                  | Page 127: showed that the lateral flange of the quadrate was not the quadratojugal as had been interpreted by Wiman. Page 128: noted that the pterygoid was broken immediately posterior of the ectopterygoid process. | Figure 2, a (lateral; upside down) and b (medial; upside down); Figure 6 (reversed; lateral*) | Page 209 (quadrate): fully described, interpreted to have been vertically oriented and to have had a deep posterior fossa, but also that the lateral margin of the posterior fossa and the articular end are damaged. Page 209 (pterygoid): fully described, but description was limited by the preservation and reconstruction of this element | -                           |

*Euhelopus zdanskyi* (Wiman, 1929) Romer, 1956: holotype (PMU 24705; formerly PMU R 233) elements held in the Museum of Evolution, Uppsala, Sweden

| <i>Euhelopus zdanskyi</i> holotype ("exemplar a") | PMU R 233   | PMU 24705        | Wiman, 1929                                                     |                                                                                                     | Mateer & McIntosh, 1985   |                     | Wilson & Upchurch, 2009                                                                                                             |                                                         |
|---------------------------------------------------|-------------|------------------|-----------------------------------------------------------------|-----------------------------------------------------------------------------------------------------|---------------------------|---------------------|-------------------------------------------------------------------------------------------------------------------------------------|---------------------------------------------------------|
| Element                                           | Old number  | New number       | Description                                                     | Figure(s)                                                                                           | Description               | Figure(s)           | Description                                                                                                                         | Figure(s)                                               |
| <b>Dentary and surangular (Left)</b>              | PMU R 233 a | PMU 24705/1o     | Page 10: Brief mention.                                         | Plate 1, fig. 2 (lateral*), 3 (anterodorsal*) and 6 (medial)                                        | Yes (surangular)          | Figure 6 (lateral*) | Page 210 (dentary): fully described, U-shaped nature of the jaw highlighted; left surangular mentioned in specimen list on page 207 | -                                                       |
| <b>Dentary and surangular (Right)</b>             | PMU R 233 a | PMU 24705/1p     | Page 10: Brief mention.                                         | Plate 1, fig. 1 (lateral*), 3 (anterodorsal*), 5 (medial)                                           | Yes (surangular, angular) | -                   | Page 210 (dentary): fully described; Page 210 (surangular): brief mention; right angular listed on page 207                         | -                                                       |
| <b>Axis</b>                                       | PMU R 233 b | PMU 24705/2a     | Page 12: Brief description.                                     | Plate 3, fig. 1 (dorsal*), 2 (ventral*), 3 (left lateral*) and 5 (anterior)                         | -                         | -                   | Pages 211-212: fully described                                                                                                      | Figure 7, a (left lateral) and b (right posterolateral) |
| <b>Cervical III</b>                               | PMU R 233 c | PMU 24705/3a     | Pages 12-18: presacral vertebrae described in dedicated section | Plate 3, fig. 1 (dorsal*), 2 (ventral*), 3 (left lateral*), 6 (anterior) and 7 (posterior)          | -                         | -                   | Pages 212-217 (postaxial cervical vertebrae): fully described                                                                       | Figure 8 (right lateral)                                |
| <b>Cervical IV</b>                                | PMU R 233 d | PMU 24705/4      | Pages 12-18: presacral vertebrae described in dedicated section | Plate 3, fig. 1 (dorsal*), 2 (ventral*), 3 (left lateral*) and 8 (anterior)                         | -                         | -                   | Pages 212-217 (postaxial cervical vertebrae): fully described; Pages 217-218 (ribs): fully described                                |                                                         |
| <b>Cervical V</b>                                 | PMU R 233 e | PMU 24705/5      | Pages 12-18: presacral vertebrae described in dedicated section | Plate 3, fig. 1 (dorsal*), 2 (ventral*) and 3 (left lateral*)                                       | -                         | -                   | Pages 212-217 (postaxial cervical vertebrae): fully described; Pages 217-218 (ribs): fully described                                |                                                         |
| <b>Cervical VI</b>                                | PMU R 233 f | PMU 24705/6      | Pages 12-18: presacral vertebrae described in dedicated section | Plate 3, fig. 1 (dorsal*), 2 (ventral*) and 3 (left lateral*)                                       | -                         | -                   | Pages 212-217 (postaxial cervical vertebrae): fully described; Pages 217-218 (ribs): fully described                                |                                                         |
| <b>Cervical VII-VIII</b>                          | PMU R 233 g | PMU 24705/7a, 8  | Pages 12-18: presacral vertebrae described in dedicated section | Plate 3, fig. 1 (dorsal*), 2 (ventral*), 3 (left lateral*) and 9 (VIII, posterior)                  | -                         | -                   | Pages 212-217 (postaxial cervical vertebrae): fully described; Pages 217-218 (ribs): fully described                                | Figure 9 (VIII, right lateral)                          |
| <b>Cervical rib VII (Left)</b>                    | PMU R 233 h | PMU 24705/7b     | Pages 12-18: presacral vertebrae described in dedicated section | Plate 3, fig. 1 (dorsal*), 2 (ventral*) and 3 (left lateral*)                                       | -                         | -                   | Pages 217-218 (cervical ribs): fully described                                                                                      |                                                         |
| <b>Cervicals IX-X</b>                             | PMU R 233 i | PMU 24705/9a, 10 | Pages 12-18: presacral vertebrae described in dedicated section | Plate 3, fig. 1 (dorsal*), 2 (ventral*), 3 (left lateral*), 10 (IX, anterior) and 11 (X, posterior) | -                         | -                   | Pages 212-217 (postaxial cervical vertebrae): fully described; Pages 217-218 (ribs): fully described                                | Figure 10 (X, right lateral)                            |
| <b>Cervical XI</b>                                | PMU R 233 j | PMU 24705/11     | Pages 12-18: presacral vertebrae described in dedicated section | Plate 3, fig. 1 (dorsal*), 2 (ventral*), 3 (left lateral*), 12 (anterior) and 13 (posterior)        | -                         | -                   | Pages 212-217 (postaxial cervical vertebrae): fully described; Pages 217-218 (cervical ribs): fully described                       |                                                         |

*Euhelopus zdanskyi* (Wiman, 1929) Romer, 1956: holotype (PMU 24705; formerly PMU R 233) elements held in the Museum of Evolution, Uppsala, Sweden

| <i>Euhelopus zdanskyi</i> holotype ("exemplar a")   | PMU R 233   | PMU 24705       | Wiman, 1929                                                                                            |                                                                                                                            | Mateer & McIntosh, 1985                                                                               |                                                          | Wilson & Upchurch, 2009                                                                                                                                          |                                                                                                                                                           |
|-----------------------------------------------------|-------------|-----------------|--------------------------------------------------------------------------------------------------------|----------------------------------------------------------------------------------------------------------------------------|-------------------------------------------------------------------------------------------------------|----------------------------------------------------------|------------------------------------------------------------------------------------------------------------------------------------------------------------------|-----------------------------------------------------------------------------------------------------------------------------------------------------------|
| Element                                             | Old number  | New number      | Description                                                                                            | Figure(s)                                                                                                                  | Description                                                                                           | Figure(s)                                                | Description                                                                                                                                                      | Figure(s)                                                                                                                                                 |
| <b>Cervicals XII-XIV</b>                            | PMU R 233 k | PMU 24705/12-14 | Pages 12-18: presacral vertebrae described in dedicated section                                        | Plate 3, fig. 1 (dorsal*), 2 (ventral*), 3 (left lateral*), 14 (XII, anterior), 15 (XIV, posterior) and 16 (XIV, anterior) | -                                                                                                     | -                                                        | Pages 212-217 (all postaxial cervical vertebrae): fully described; Pages 217-218 (ribs): fully described                                                         | Figure 11 (XIV, right lateral)                                                                                                                            |
| <b>Cervicals XV-XVII and dorsal I</b>               | PMU R 233 l | PMU 24705/15-18 | Pages 12-18: presacral vertebrae described in dedicated section                                        | Plate 3, fig. 1 (dorsal*), 2 (ventral*), 3 (left lateral*) and 17 (dorsal I, posterior)                                    | -                                                                                                     | -                                                        | Pages 212-217 (postaxial cervical vertebrae): fully described; Pages 217-218 (ribs): fully described; Pages 218-219 (anterior dorsal vertebrae): fully described | Figure 11 (XV, right lateral); Figure 12 (XVI-XVII, right lateral)                                                                                        |
| <b>Dorsals II-VIII</b>                              | PMU R 233 m | PMU 24705/19-25 | Pages 12-18: presacral vertebrae described in dedicated section                                        | Plate 3, fig. 1 (dorsal*), 2 (ventral*), 3 (left lateral*), 4 (right lateral*) and 18 (II, anterior)                       | -                                                                                                     | -                                                        | Pages 218-221: fully described                                                                                                                                   | Figure 14 (VII, right lateral); Figure 15 (II-IV, dorsal); Figure 16 (II-V, right lateral); Figure 17 (VI, right lateral); Figure 18 (VII, right lateral) |
| <b>Femur (Left)</b>                                 | PMU R 233 n | PMU 24705/28    | Page 18: described as having a short well-developed fourth trochanter and spongy internal bone texture | Plate 3, fig. 20 (posterior), 21 (lateral), 22 (anterior) and 23 (proximal)                                                | -                                                                                                     | -                                                        | Pages 223-224: fully described                                                                                                                                   |                                                                                                                                                           |
| <b>Dorsal rib III (Left)</b>                        | PMU R 233 o | PMU 24705/27a   | Page 18: brief mention; pages 22-23: brief description                                                 | Plate 3, fig. 18 (anterior) and 19 (posterior)                                                                             | -                                                                                                     | -                                                        | Page 221: fully described                                                                                                                                        | Figure 21 (posterior; proximal end only)                                                                                                                  |
| <b>?Splenic (?Right)</b>                            | PMU R 233 p | PMU 24705/1t    | -                                                                                                      | -                                                                                                                          | -                                                                                                     | -                                                        | -                                                                                                                                                                | -                                                                                                                                                         |
| <b>Rock associated with skull block</b>             | PMU R 233 q | PMU 24705/1x    | -                                                                                                      | -                                                                                                                          | -                                                                                                     | -                                                        | -                                                                                                                                                                | -                                                                                                                                                         |
| <b>Prearticular (Left)</b>                          | PMU R 233 r | PMU 24705/1r    | -                                                                                                      | -                                                                                                                          | Page 128: described as a left and as being similar to the prearticular of <i>Camarasaurus</i>         | Figure 4, a (lateral) and b (medial)                     | Page 207: mentioned in specimen list                                                                                                                             | -                                                                                                                                                         |
| <b>Angular (Right)</b>                              | PMU R 233 s | PMU 24705/1q    | -                                                                                                      | -                                                                                                                          | Page 128: described as the right angular, said to closely resemble the angular of <i>Camarasaurus</i> | Figure 4, c ("upper" = medial) and d ("lower" = lateral) | Page 210: described as the left angular, absence of evidence for mandibular fenestra noted                                                                       | -                                                                                                                                                         |
| <b>Nasal and Prefrontal (Right; caudal portion)</b> | PMU R 233 t | PMU 24705/1d    | -                                                                                                      | -                                                                                                                          | Page 125: described as the right frontal                                                              | Figure 1, c (dorsal) and d (ventral)                     | Page 208: fully described as left nasal, interpreted as having anteromedial and anterolateral processes                                                          | -                                                                                                                                                         |
| <b>Jugal (Right)</b>                                | PMU R 233 u | PMU 24705/1u    | -                                                                                                      | -                                                                                                                          | -                                                                                                     | -                                                        | -                                                                                                                                                                | -                                                                                                                                                         |
| <b>Nasal (Right; rostral portion)</b>               | PMU R 233 v | PMU 24705/1c    | -                                                                                                      | -                                                                                                                          | -                                                                                                     | -                                                        | -                                                                                                                                                                | -                                                                                                                                                         |

*Euhelopus zdanskyi* (Wiman, 1929) Romer, 1956: holotype (PMU 24705; formerly PMU R 233) elements held in the Museum of Evolution, Uppsala, Sweden

| <i>Euhelopus zdanskyi</i> holotype ("exemplar a") | PMU R 233   | PMU 24705     | Wiman, 1929                   |                                                         | Mateer & McIntosh, 1985                                                                                                        |                                                                              | Wilson & Upchurch, 2009                                                                                                                                        |           |
|---------------------------------------------------|-------------|---------------|-------------------------------|---------------------------------------------------------|--------------------------------------------------------------------------------------------------------------------------------|------------------------------------------------------------------------------|----------------------------------------------------------------------------------------------------------------------------------------------------------------|-----------|
| Element                                           | Old number  | New number    | Description                   | Figure(s)                                               | Description                                                                                                                    | Figure(s)                                                                    | Description                                                                                                                                                    | Figure(s) |
| <b>Quadratojugal (Right; dorsal process)</b>      | PMU R 233 w |               |                               |                                                         |                                                                                                                                |                                                                              |                                                                                                                                                                |           |
|                                                   | PMU R 233 x | PMU 24705/1s  | -                             | -                                                       | -                                                                                                                              | -                                                                            | -                                                                                                                                                              | -         |
| <b>Postorbital (Right; jugal process)</b>         | PMU R 233 y | PMU 24705/1v  | -                             | -                                                       | -                                                                                                                              | -                                                                            | -                                                                                                                                                              | -         |
| <b>Quadratojugal (Left)</b>                       | PMU R 233 z | PMU 24705/1i  | -                             | -                                                       | Page 127: identified and likened to the quadratojugal of <i>Camarasaurus</i> and <i>Giraffatitan</i> ( <i>Brachiosaurus</i> ). | Figure 3, e (medial)                                                         | Page 209: fully described, both quadratojugals interpreted as having the tops of their anterodorsal processes (which may have contacted the squamosal) missing | -         |
| <b>Quadratojugal (Right)</b>                      | PMU R 233 å | PMU 24705/1j  | -                             | -                                                       | Page 127: identified and likened to the quadratojugal of <i>Camarasaurus</i> and <i>Giraffatitan</i> ( <i>Brachiosaurus</i> ). | Figure 3, f (medial); Figure 6 (reversed; lateral*)                          | Page 209: fully described, both quadratojugals interpreted as having the tops of their anterodorsal processes (which may have contacted the squamosal) missing | -         |
| <b>Pterygoid (Left; partial)</b>                  | PMU R 233 ä | PMU 24705/1l  | -                             | -                                                       | -                                                                                                                              | -                                                                            | -                                                                                                                                                              | -         |
| <b>Pterygoid (Left; partial)</b>                  | PMU R 233 ö | PMU 24705/1w  | -                             | -                                                       | -                                                                                                                              | -                                                                            | -                                                                                                                                                              | -         |
| <b>Lacrimal (Left)</b>                            | PMU R 233 α | PMU 24705/1e  | -                             | -                                                       | Page 127: identified and briefly described; right is incorrectly stated to be the more complete                                | Figure 3, c (medial) and d (lateral); Figure 6 (upside down; lateral*)       | Page 207: mentioned in specimen list                                                                                                                           | -         |
| <b>Lacrimal (Right)</b>                           | PMU R 233 β | PMU 24705/1f  | -                             | -                                                       | Page 127: identified and briefly described; right is incorrectly stated to be the more complete                                | Figure 3, a (anterolateral; upside down) and b (posterolateral, upside down) | Page 207: mentioned in specimen list                                                                                                                           | -         |
| <b>Palatine (Right)</b>                           | PMU R 233 γ | PMU 24705/1n  | Page 8: described as a vomer. | Plate 2, fig. 8 (medial), 9 (ventral) and 10 (lateral). | Page 127: identified as vomer, briefly described.                                                                              | Figure 2, c (lateral) and d (medial)                                         | Page 209: fully described.                                                                                                                                     | -         |
| <b>Palatine (Left)</b>                            | PMU R 233 δ | PMU 24705/1m  | Page 8: described as a vomer. | Plate 2, fig. 11 (medial)                               | Page 127: identified as vomer, briefly described.                                                                              | -                                                                            | Page 209: fully described.                                                                                                                                     | -         |
| <b>Dorsal rib V (Left; proximal)</b>              | PMU R 233 ε | PMU 24705/27b | -                             | -                                                       | -                                                                                                                              | -                                                                            | Page 221: incorrectly stated as absent                                                                                                                         | -         |
| <b>Dorsal rib (Left; proximal)</b>                | PMU R 233 ζ | PMU 24705/27c | -                             | -                                                       | -                                                                                                                              | -                                                                            | Page 221: incorrectly stated as absent                                                                                                                         | -         |
| <b>Cervical rib II (proximal)</b>                 | PMU R 233 η | PMU 24705/2b  | -                             | -                                                       | -                                                                                                                              | -                                                                            | Page 217: incorrectly stated as absent                                                                                                                         | -         |
| <b>Cervical rib III (Right)</b>                   | PMU R 233 θ | PMU 24705/3c  | -                             | -                                                       | -                                                                                                                              | -                                                                            | Page 217: incorrectly stated not to be present                                                                                                                 | -         |
| <b>Cervical ribs (distal) in matrix</b>           | PMU R 233 ι | PMU 24705/26h | -                             | -                                                       | -                                                                                                                              | -                                                                            | -                                                                                                                                                              | -         |
| <b>Cervical rib (distal)</b>                      | PMU R 233 κ | PMU 24705/26a | -                             | -                                                       | -                                                                                                                              | -                                                                            | Pages 217-218 (cervical ribs): fully described                                                                                                                 | -         |
| <b>Cervical rib (distal)</b>                      | PMU R 233 λ | PMU 24705/26b | -                             | -                                                       | -                                                                                                                              | -                                                                            | Pages 217-218 (cervical ribs): fully described                                                                                                                 | -         |

*Euhelopus zdanskyi* (Wiman, 1929) Romer, 1956: holotype (PMU 24705; formerly PMU R 233) elements held in the Museum of Evolution, Uppsala, Sweden

| <i>Euhelopus zdanskyi</i> holotype ("exemplar a")                                                                                                                                                                                                                                                           | PMU R 233    | PMU 24705     | Wiman, 1929            |                                          | Mateer & McIntosh, 1985 |           | Wilson & Upchurch, 2009                                                                                                                                    |           |
|-------------------------------------------------------------------------------------------------------------------------------------------------------------------------------------------------------------------------------------------------------------------------------------------------------------|--------------|---------------|------------------------|------------------------------------------|-------------------------|-----------|------------------------------------------------------------------------------------------------------------------------------------------------------------|-----------|
| Element                                                                                                                                                                                                                                                                                                     | Old number   | New number    | Description            | Figure(s)                                | Description             | Figure(s) | Description                                                                                                                                                | Figure(s) |
| Cervical rib (distal)                                                                                                                                                                                                                                                                                       | PMU R 233 μ  | PMU 24705/26c | -                      | -                                        | -                       | -         | Pages 217-218 (cervical ribs): fully described                                                                                                             | -         |
| Cervical rib (distal)                                                                                                                                                                                                                                                                                       | PMU R 233 ν  | PMU 24705/26d | -                      | -                                        | -                       | -         | Pages 217-218 (cervical ribs): fully described                                                                                                             | -         |
| Cervical rib (distal)                                                                                                                                                                                                                                                                                       | PMU R 233 ξ  | PMU 24705/26e | -                      | -                                        | -                       | -         | Pages 217-218 (cervical ribs): fully described                                                                                                             | -         |
| Cervical rib (distal)                                                                                                                                                                                                                                                                                       | PMU R 233 ο  | PMU 24705/26f | -                      | -                                        | -                       | -         | Pages 217-218 (cervical ribs): fully described                                                                                                             | -         |
| Cervical rib III (Left)                                                                                                                                                                                                                                                                                     | PMU R 233 ϕ  | PMU 24705/3b  | -                      | -                                        | -                       | -         | Page 217: incorrectly stated as absent                                                                                                                     | -         |
| Cervical rib IX (Left; distal)                                                                                                                                                                                                                                                                              | -            | PMU 24705/9b  | -                      | -                                        | -                       | -         | Pages 217-218 (cervical ribs): fully described                                                                                                             | -         |
| Cervical rib (distal)                                                                                                                                                                                                                                                                                       | -            | PMU 24705/26g | -                      | -                                        | -                       | -         | Pages 217-218 (cervical ribs): fully described                                                                                                             | -         |
| Cervical rib in matrix                                                                                                                                                                                                                                                                                      | -            | PMU 24705/26i | -                      | -                                        | -                       | -         | -                                                                                                                                                          | -         |
| Dorsal rib VII (mid-shaft)                                                                                                                                                                                                                                                                                  | -            | PMU 24705/27d | -                      | -                                        | -                       | -         | Page 221: incorrectly stated as absent                                                                                                                     | -         |
| Unidentified element (fragmentary)                                                                                                                                                                                                                                                                          | -            | PMU 24705/29  | -                      | -                                        | -                       | -         | -                                                                                                                                                          | -         |
| Unidentified large element (fragmentary)                                                                                                                                                                                                                                                                    | -            | PMU 24705/30  | -                      | -                                        | -                       | -         | -                                                                                                                                                          | -         |
| Eight loose teeth with buttress at bottom right when oriented with crown dorsally and root ventrally (i.e. left premaxillary or maxillary teeth, or right dentary teeth); likely to be mostly, if not exclusively, right dentary teeth since the left premaxilla and maxilla have few if any vacant alveoli | "PMU M 2983" | PMU 24705/1y  | Page 10: brief mention | Plate 2, fig. 18; 19-20; 21-22; 23.      | -                       | -         | Pages 210: fully described, dental formula = premaxilla 4; maxilla 10; dentary 13; occlusal pattern, wear, enamel texture and lingual buttresses all noted | -         |
| Seven teeth with buttress at bottom left when oriented with crown dorsally and root ventrally (i.e. right premaxillary or maxillary teeth, or left dentary teeth); likely to be mostly, if not exclusively, left dentary teeth since the right premaxilla and maxilla have few vacant alveoli               | "PMU M 2983" | PMU 24705/1y  | Page 10: brief mention | Plate 2, fig. 12-13, 24; 14; 15; 16; 17. | -                       | -         | Pages 210: fully described, dental formula = premaxilla 4; maxilla 10; dentary 13; occlusal pattern, wear, enamel texture and lingual buttresses all noted | -         |

An asterisk (\*) indicates that a bone is figured as part of a reconstruction. Elements described by Young (1935) are currently lost and not included in this list.

## References

- Mateer, N.J., McIntosh, J.S., 1985. A new reconstruction of the skull of *Euhelopus zdanskyi* (Saurischia: Sauropoda). **Bulletin of the Geological Institution of the University of Uppsala (new series)** 11, 124-132.
- Wilson, J.A., Upchurch, P., 2009. Redescription and reassessment of *Euhelopus zdanskyi* (Dinosauria: Sauropoda) from the Early Cretaceous of China. **Journal of Systematic Palaeontology** 7, 199-239.
- Wiman, C., 1929. Die Kreide-Dinosaurier aus Shantung [The Cretaceous Dinosaur from Shantung]. **Palaeontologia Sinica (Series C)** 6, 1-67.

Poropat and Kear: Photographic atlas and three-dimensional reconstruction of the holotype skull of *Euhelopus zdanskyi* with description of additional cranial elements
